# Supplementary material for: A histone H4 lysine 20 methyltransferase couples environmental cues to sensory neuron control of developmental plasticity
Source: Oxford University Press journal article supplement (doi:10.1242/dev.145722), 2017-02-16
Supplement: dev145722supp.pdf [file dev145722supp.pdf]

## SUPPLEMENTARY MATERIALS AND METHODS

### Strains

The following mutant alleles were used: *eak-7(tm3188)* ([Alam et al., 2010](#)), *akt-1(ok525)* ([Hertweck et al., 2004](#)), *set-4(n4600)* ([Andersen and Horvitz, 2007](#)), *set-4(ok1481)*, *daf-2(e1368)* ([Kimura et al., 1997](#)), *daf-1(m40)* ([Georgi et al., 1990](#)), *daf-9(dh6)* ([Gerisch et al., 2001](#)), *dpy-21(e428)* ([Yonker and Meyer, 2003](#)), *daf-16(mu86)* ([Lin et al., 1997](#)), *daf-12(rh61rh411)* ([Antebi et al., 2000](#)), *akt-2(ok393)* ([Hertweck et al., 2004](#)), *ins-7(tm1907)* ([Murphy et al., 2007](#)), *daf-8(e1393)* ([Park et al., 2010](#)), and *daf-36(k114)* ([Rottiers et al., 2006](#)). *set-4(n4600)* and *set-4(ok1481)* were a gift from Gyorgyi Csankovszki.

### Reporter constructs and transgenic strains

DNA fragments were amplified and assembled using overlap PCR, and fusion products were cloned into pCRXL-TOPO (Invitrogen). GFP, mCherry, and mNeonGreen were amplified from pPD95.75, pSA120, and pDD268, respectively. The identities of fusion products were verified by Sanger sequencing. To generate the single-copy rescuing transgenic strain *dpSi5*, the 638 bp genomic fragment between *set-4* and the upstream gene C32D5.6 (*set-4p*) was amplified and fused to sequence encoding a HA epitope tag followed by the *set-4* open reading frame (*HA::set-4*) and 350 bp of genomic DNA downstream of *set-4* (*set-4utr*) to create *set-4p::HA::set-4::set-4utr*. Single-copy mosSCI integration of *set-4p::HA::set-4::set-4utr* into strain EG6250 (*cxTi10882*) was performed by Knudra Transgenics as described ([Frokjaer-Jensen et al., 2008](#)). The *set-4p::GFP* transcriptional reporter was generated by fusing *set-4p* to GFP and *set-4utr* to create *set-4p::GFP::set-4utr*. *set-4p::GFP::set-4utr* was mixed with 50 ng  $\mu\text{L}^{-1}$  *rol-6(su1006)* (pRF4) or 10 ng  $\mu\text{L}^{-1}$  *rab-3p::mcherry::unc-54utr* to a final DNA concentration of 100 ng  $\mu\text{L}^{-1}$  or 50 ng  $\mu\text{L}^{-1}$ , respectively. For tissue-specific rescue experiments, promoters defined by the Promoterome Project ([worfdb.dfci.harvard.edu/promoteromedb](http://worfdb.dfci.harvard.edu/promoteromedb)) were amplified from wild-type genomic DNA and fused to *HA::set-4::set-4utr*. The sizes of promoter fragments amplified were as follows: *set-4p*: 638 bp; *rab-3p*: 4913bp; *col-19p*: 1321 bp; *myo-3p*: 2006 bp; *elt-2p*: 1988 bp. Constructs were co-injected with *myo-2p::mcherry::unc-54utr* (pJK343) and

pBlueScript at concentrations of 5, 2, and 43 ng  $\mu\text{L}^{-1}$ , respectively. To generate the polycistronic *ins-9::SL2::mNG* transgene, a 1939 bp genomic fragment upstream of *ins-9* was fused to *ins-9* and the intercistronic genomic fragment between *gpd-2* and *gpd-3*, mNeonGreen, and a 1017 bp genomic fragment downstream of *ins-9*. 40 ng  $\mu\text{L}^{-1}$  *ins-9::SL2::mNG* was mixed with 10 ng  $\mu\text{L}^{-1}$  *rab-3p::mcherry::unc-54utr*. Animals were injected as previously described (Mello et al., 1991) using a Leica DMI3000B microscope and Eppendorf FemtoJet pump.

## Antibodies

For immunoblotting, both custom anti-SET-4 antisera, generated by immunizing rabbits with a C-terminal SET-4 peptide ( $\text{NH}_3$ -ENAEPIISEKKTKYELRSRS-COOH) (Pierce), and anti-H4K20me3 antibodies (Abcam #ab78517) were diluted 1:500. Anti-H4K20me2 antibodies (Abcam #ab9052) and anti-histone H3 antibodies (Abcam #ab12079) were diluted 1:2000 and 1:1000, respectively. The specificity of anti-H4K20me2 and anti-H4K20me3 antibodies was verified using competitive peptide-binding arrays. Methodology and results are available at [www.histoneantibodies.com](http://www.histoneantibodies.com).

## Dauer pheromone preparation

Wild-type animals were washed into a 2.8L Fernbach flask containing 1L S medium to which 25mL of 40X *E. coli* HB101 culture was added. After media clarified, another 25mL of 40X HB101 was added. Four days later, supernatant was filtered through a Buchner funnel, then vacuum filtered through 0.22  $\mu\text{m}$  SteriTop units (Millipore). Clarified supernatant was evaporated to dryness using a V-10 evaporator (Biotage). Solids were extracted three times with 100 mL 100% ethanol, then evaporated. Pheromone was resuspended in ethanol and effective doses determined empirically. 3.5 cm plates containing 2 mL NGM made with Noble Agar (BD) and lacking peptone were treated with 500  $\mu\text{L}$  water containing the indicated volume of pheromone. Once dry, plates were seeded with 20  $\mu\text{L}$  of 6X *E. coli* OP50 in S basal. Dauer assays were performed as above with animals scored after 84 hr at 25°C.

**A**

*C. elegans* SET-4 169-DEDSILAQEGSDFSVMYSTRKRCSTLWLGPAAFINHDCKPNCKFV  
*D. melanogaster* Hmt4-20 297-EFAALLHSGKNDFSVMYSCRKNCAQLWLGPAAYINHDCRANCKFL  
*H. sapiens* suv420H1 239-EENMLLRHGENDFSVMYSTRKNCAQLWLGPAAFINHDCRPNCKFV  
*M. musculus* suv420H2 149-DEDLLRAGE-NDFSIMYSTRKRSACLWLGPAAFINHDCKPNCKFV  
*S. pombe* Set9 255-EERNIGI--GKDFSILHSSRLDSMCLFLGPARFVNHDCNANCRFN

**B**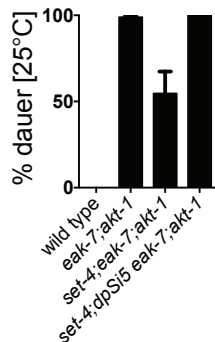**C**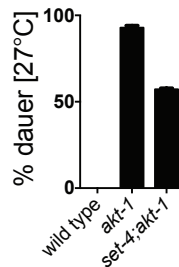**D**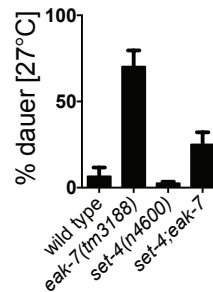**E**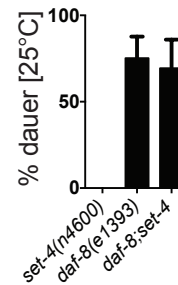**F**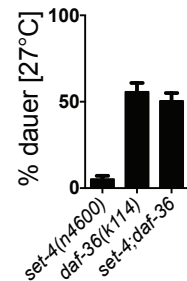**G**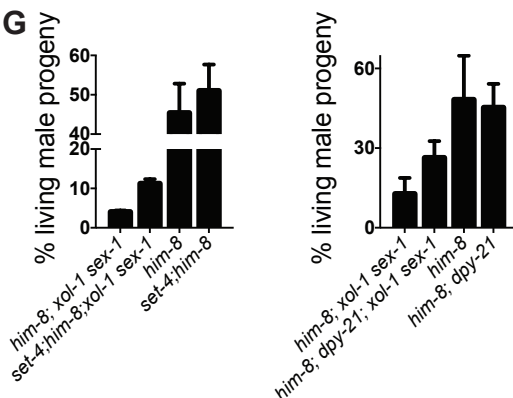

### Figure S1. SET-4 promotes dauer arrest and participates in dosage compensation.

(A) Conservation of SET-4 serine 182 within the SET domain. Identical and conserved residues are denoted by black and gray shading, respectively. SET-4 serine 182 is denoted by the arrow. (B) The single-copy *set-4* transgene *dpSi5* rescues dauer arrest in *set-4;eak-7;akt-1* animals (N = 720, 1555, 1096, 1351). *set-4* mutation partially suppresses the 27°C dauer-constitutive phenotype of (C) *akt-1* (N = 806, 1077, 1121) and (D) *eak-7* mutants (N = 409, 472, 379, 318). *set-4* is dispensable for dauer arrest in (E) *daf-8* (N = 609, 530, 496) and (F) *daf-36* mutants (N = 653, 247, 242). (G) *set-4* (N = 4052, 3475, 4486, 3845) and *dpy-21* (N = 3383, 1886, 4171, 3441) mutations rescue viability of *him-8;xol-1 sex-1* mutant males. Data are representative of three biological replicates.

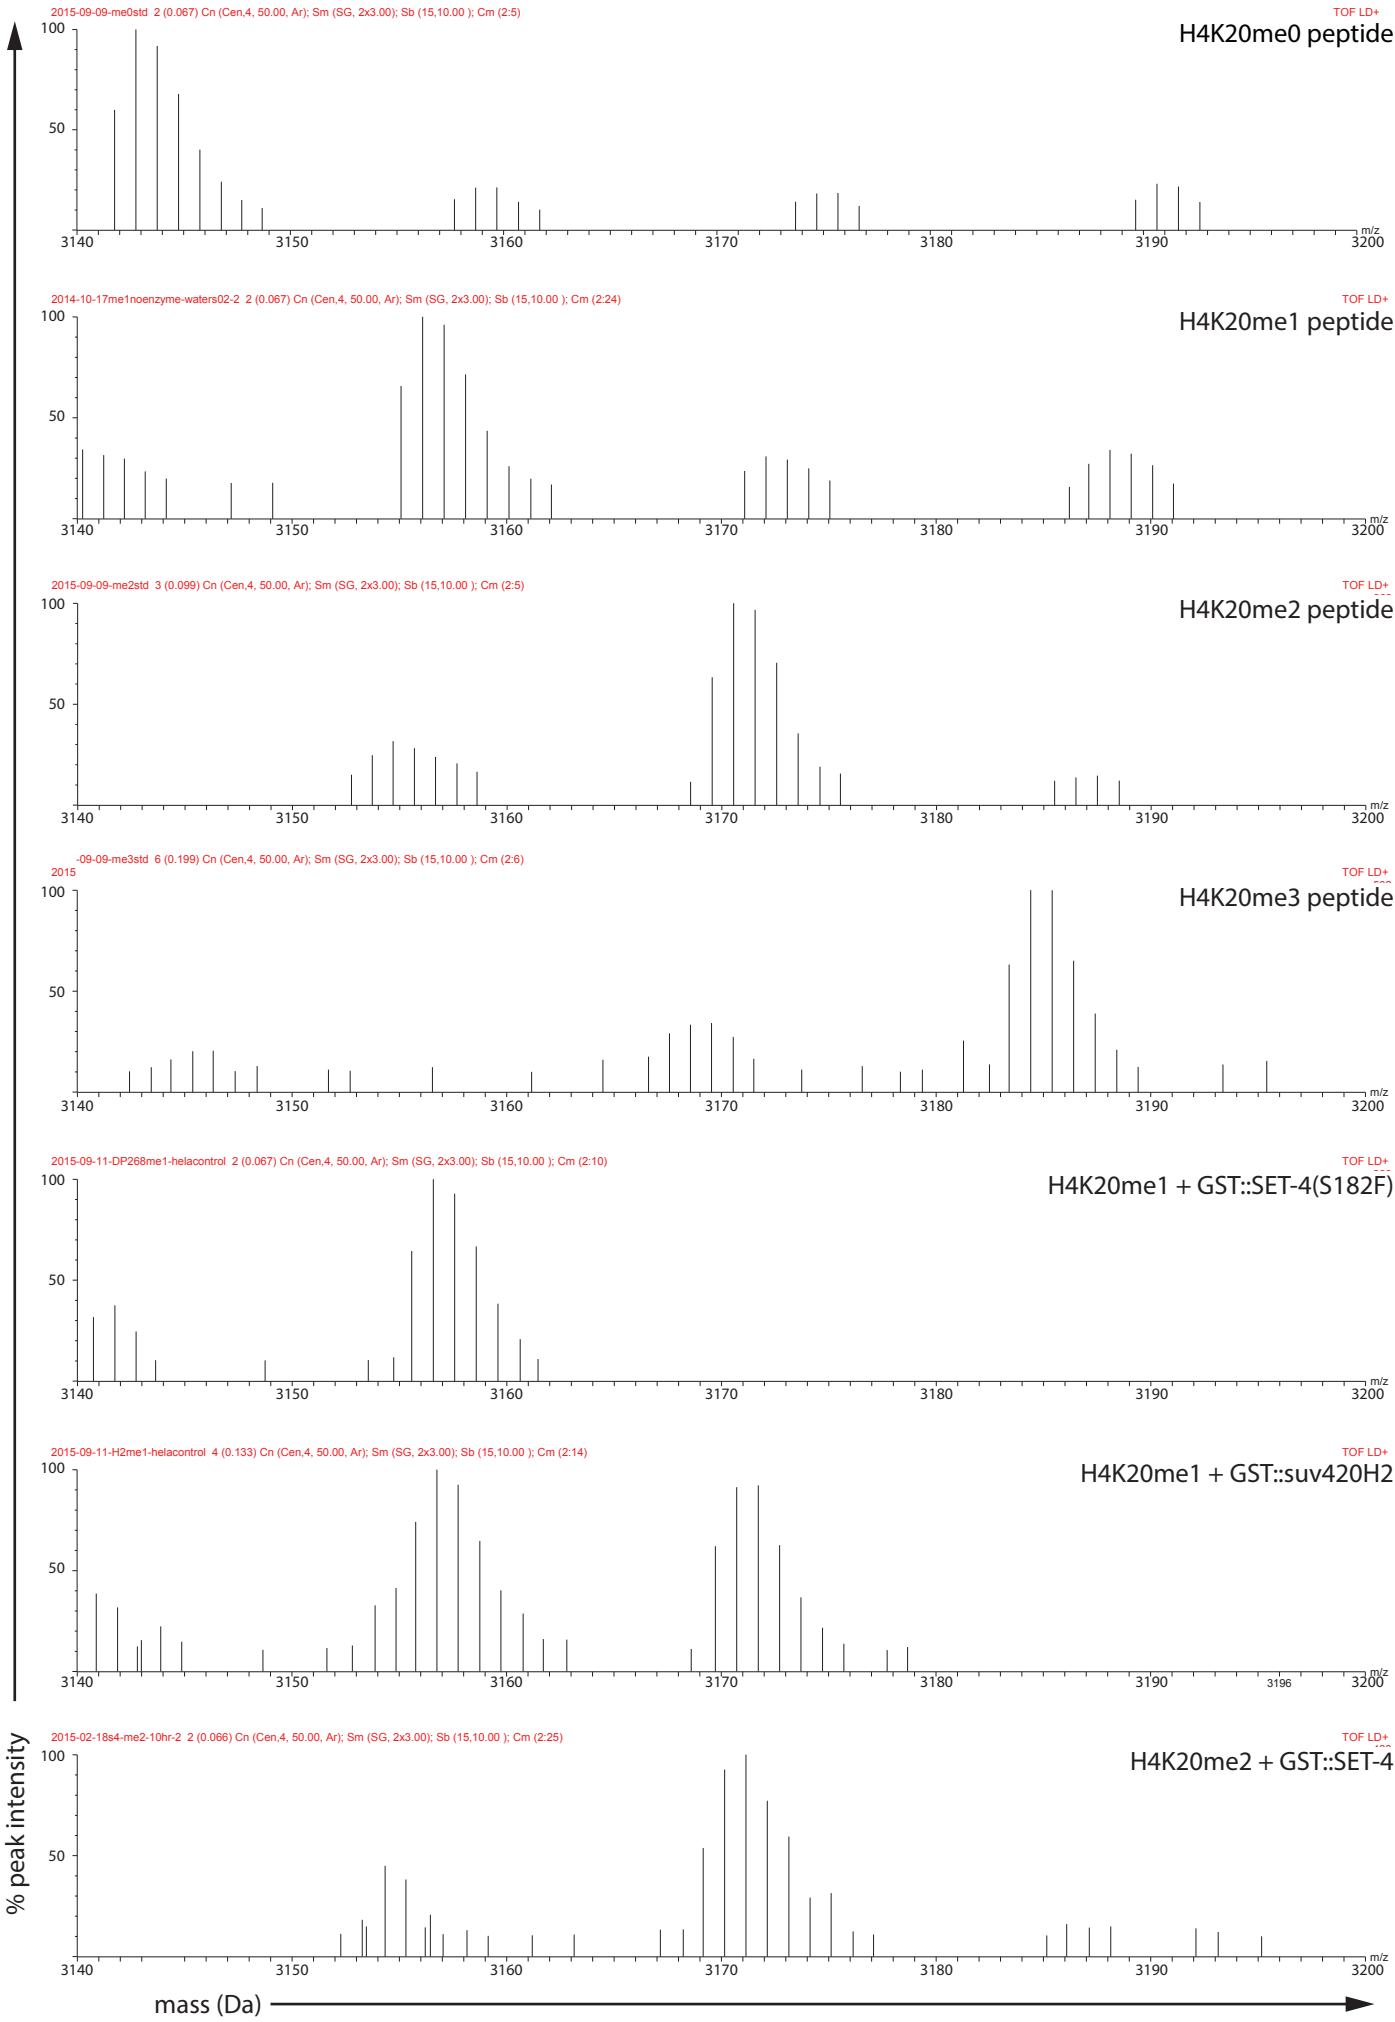

**Figure S2. MALDI spectra of methyltransferase assays.** Peptide substrates and GST fusion proteins (if any) are indicated. Data are representative of three independent experiments.

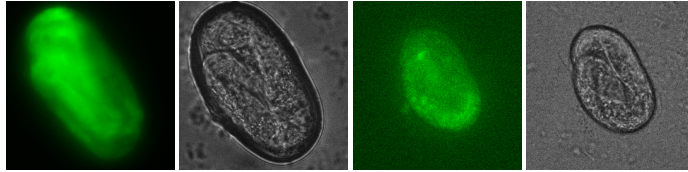

**Figure S3. *set-4p::gfp* expression in embryos.** Embryos from 3 independent transgenic lines were picked from plates and subjected to Nomarski and fluorescent imaging using an Olympus BX61 epifluorescence compound microscope outfitted with a Hamamatsu ORCA ER camera and Slidebook 4.0.1 software. Representative images shown. N = 10.

**A**

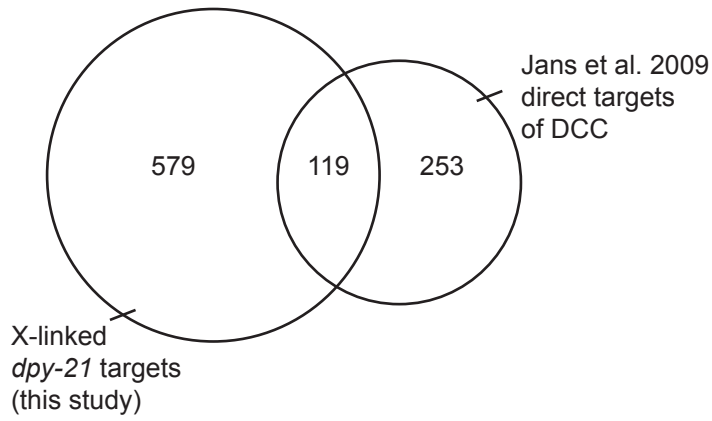

**B**

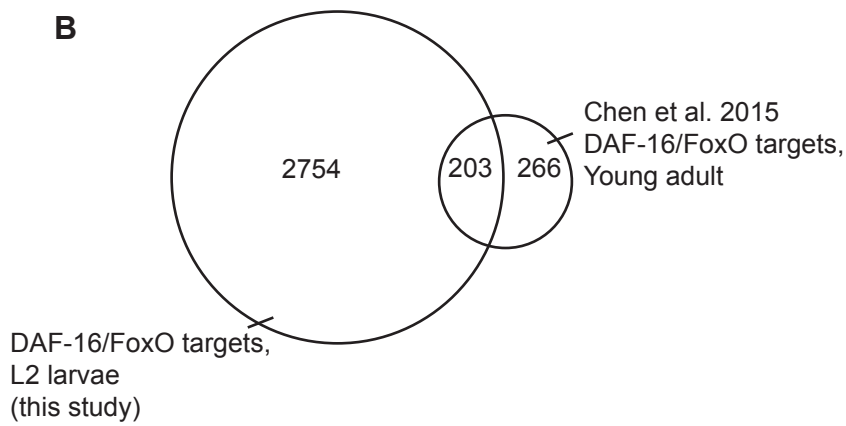

**C**

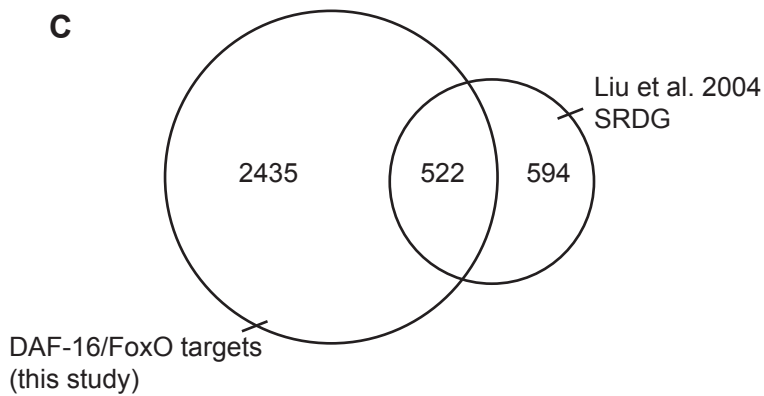

**D**

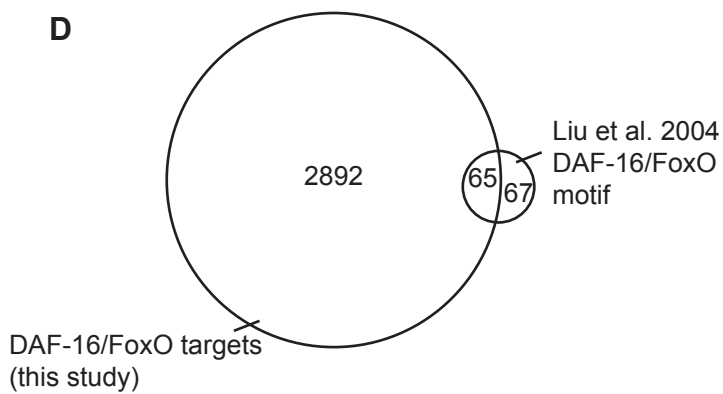

**Figure S4. Comparison of whole transcriptome profiling results from this study to published studies.** Venn diagrams depicting significant overlap between (A) X-linked genes regulated by *dpy-21* and direct DCC targets (Jans et al., 2009) (overlapping genes listed in Table S2); (B) DAF-16/FoxO target genes in L2 larvae and in young adult animals (Chen et al., 2015) (overlapping genes listed in Table S3); (C) DAF-16/FoxO target genes in L2 larvae and “strongly regulated dauer genes” (SRDG) (Liu et al., 2004) (overlapping genes listed in Table S4); and (D) DAF-16/FoxO target genes in L2 larvae and SRDG containing upstream DAF-16/FoxO binding motifs (Liu et al., 2004) (overlapping genes listed in Table S4).



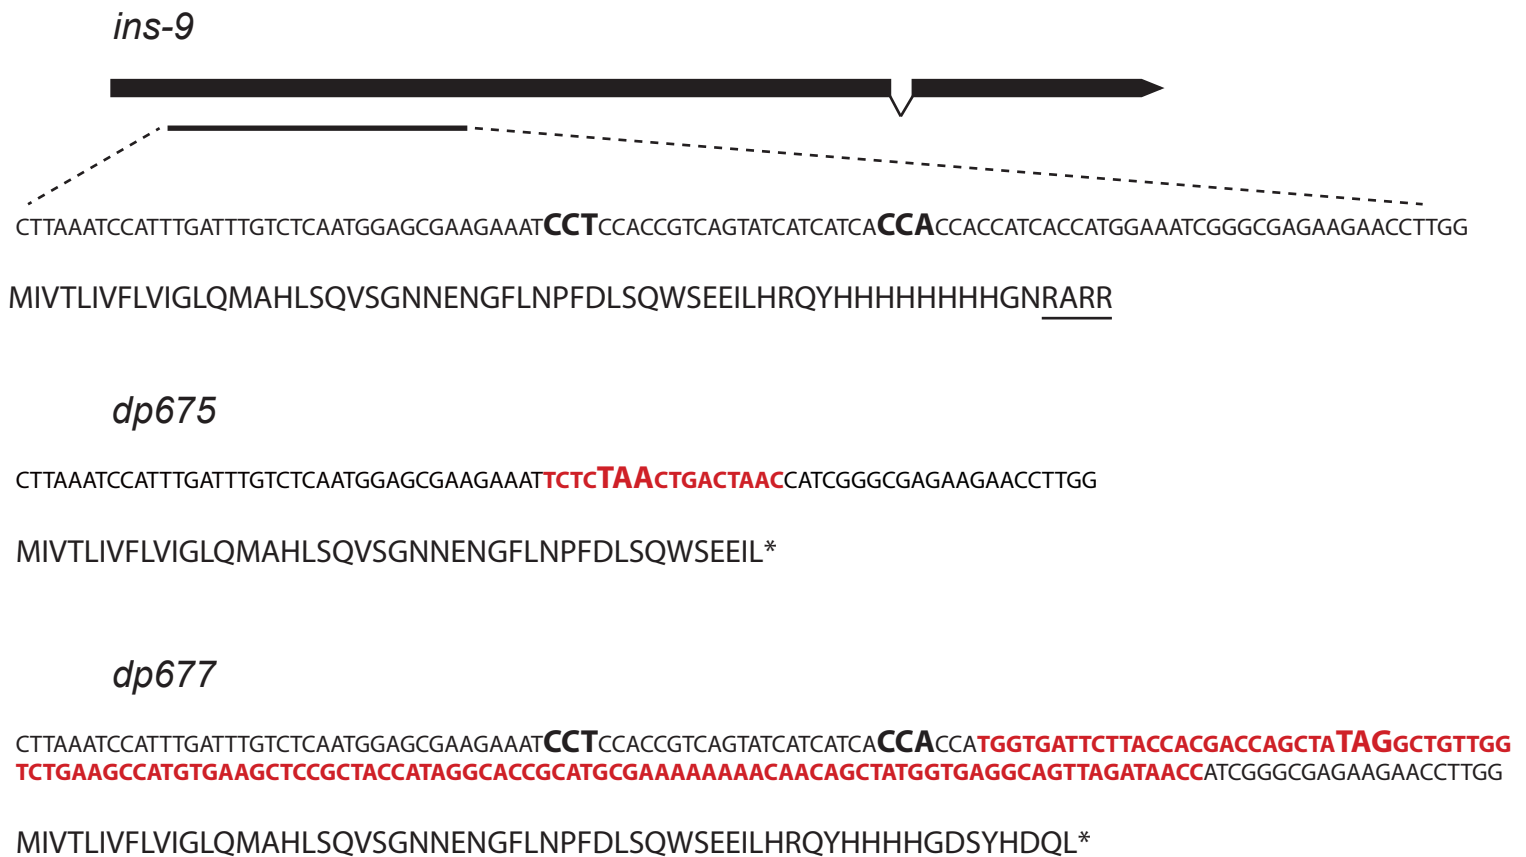

**Figure S5. Schematic of the *ins-9* genomic locus and two mutant alleles generated by CRISPR/Cas9-based genome editing.** Nucleotide sequences encoding wild-type, *dp675*, and *dp677* N-terminal F-peptides and predicted N-terminal protein sequences are shown. Targeted CRISPR/Cas9 PAM sites are indicated in bold enlarged black typeface. The putative RXRR prohormone convertase processing site between the F and B peptides is underlined. Inserted sequences in two mutant alleles are indicated in red bold text, and the resultant in-frame stop codons are shown in red, bold and enlarged typeface.

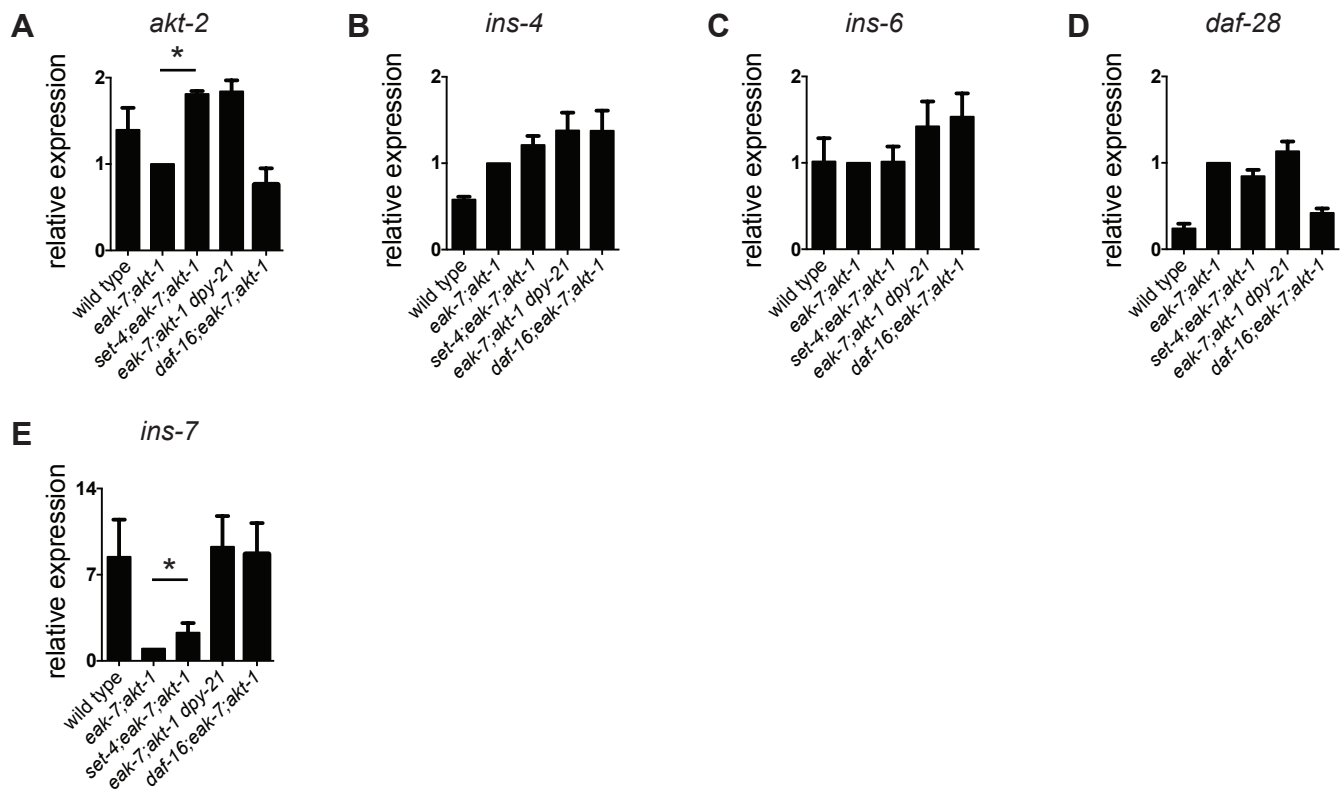

**Figure S6. Influence of the DCM and DAF-16/FoxO on the expression of *akt-2* and *ins* genes.** Transcript levels of (A) *akt-2*, (B) *ins-4*, (C) *ins-6*, (D) *daf-28*, and (E) *ins-7* in wild-type and mutant strains. Data presented is the mean plus s.e.m of at least three biological replicates.

Table S1: Lists of genes regulated by DAF-16/FoxO, DAF-12, DPY-21, SET-4, or combinations thereof, based on whole transcriptome profiling. See text for details.

[Click here to Download Table S1](#)

Table S2: Subset of DPY-21-regulated X-linked genes that were also previously identified as dosage compensated genes (Jans et al., 2009). See text for details.

[Click here to Download Table S2](#)

Table S3: DAF-16/FoxO target genes shared between this study and Chen et al., 2015. See text for details.

[Click here to Download Table S3](#)

Table S4: DAF-16/FoxO target genes shared between this study and Liu et al., 2004. See text for details.

[Click here to Download Table S4](#)

Table S5: X-linked genes regulated by both DPY-21 and DAF-16/FoxO but not by DAF-12.

[Click here to Download Table S5](#)

Table S6: Insulin-like peptide genes regulated by both DAF-16/FoxO and DPY-21.

| ILP           | chromosome | fold change <i>daf-16</i> * | fold change <i>dpy-21</i> <sup>†</sup> | <i>daf-2</i> interaction |
|---------------|------------|-----------------------------|----------------------------------------|--------------------------|
| <i>ins-33</i> | I          | 0.28                        | 0.30                                   | agonist**                |
| <i>ins-29</i> | I          | 0.54                        | 0.48                                   | ?                        |
| <i>ins-20</i> | II         | 2.65                        | 13.32                                  | antagonist@              |
| <i>ins-11</i> | II         | 2.49                        | 6.69                                   | antagonist@              |
| <i>ins-16</i> | III        | 0.03                        | 0.07                                   | ?                        |
| <i>ins-7</i>  | IV         | 10.83                       | 7.99                                   | agonist***               |
| <i>ins-35</i> | V          | 0.21                        | 0.27                                   | agonist@                 |
| <i>ins-9</i>  | X          | infinite                    | infinite                               | agonist <sup>#</sup>     |

\**daf-16;eak-7;akt-1* vs. *eak-7;akt-1*<sup>†</sup>*eak-7;akt-1 dpy-21* vs. *eak-7;akt-1*

@Fernandes de Abreu et al, 2014

\*\*Michaelson et al, 2010

\*\*\*Murphy et al, 2003

#this study

Table S7: CRISPR guide sequences and repair oligonucleotides used for CRISPR/Cas9-based genome editing.

|                            | Sequence 5' to 3'                                                                                              |
|----------------------------|----------------------------------------------------------------------------------------------------------------|
| <i>ins-9</i> guide #1      | GAUGAUGAUACUGACGGUGG                                                                                           |
| <i>ins-9</i> guide #2      | GAUUUCCAUGGUGAUGGUGG                                                                                           |
| <i>ins-9</i> repair oligo  | TTCTTAAATCCATTTGATTTGTCTCAATGGAGCGAAGAAATTC<br>TCTAACTGACTAACCATCGGGCGAGAAGAACCTTGGAAACCG<br>AAAAAATCTACCGCT   |
| <i>dpy-10</i> guide        | GCUACCAUAGGCACACGAG                                                                                            |
| <i>dpy-10</i> repair oligo | CACTTGAACCTTCAATACGGCAAGATGAGAATGACTGGAAACC<br>GTACCGCATGCGGTGCCTATGGTAGCGGAGCTTCACATGGC<br>TTCAGACCAACAGCCTAT |

Table S8: qPCR primer sequences.

| Gene          | Sequence 5' to 3' |                             |
|---------------|-------------------|-----------------------------|
| <i>akt-2</i>  | F                 | TCGTGATATGAACTCGAAAATTTGC   |
|               | R                 | ATTCTGGTGTTCGCAAAAGGTG      |
| <i>daf-28</i> | F                 | AGTCCGTGTTCCAGGTGTG         |
|               | R                 | TGTTGCGATGTCAATTCCTT        |
| <i>ins-4</i>  | F                 | AAAATCAACTCTCCCGAGCA        |
|               | R                 | GCAATGTCCATGTCCTCTTGT       |
| <i>ins-6</i>  | F                 | CGAGCAAGACGTGTTCCAG         |
|               | R                 | TCGCAATGTCCTTTCCTTCT        |
| <i>ins-9</i>  | F                 | GAAGAAATCCTCCACCGTCA        |
|               | R                 | GTTCTTCTCGCCCGATTTC         |
| <i>ins-7</i>  | F                 | GTTGTGGAAGAAGAATACATTCGTATG |
|               | R                 | TCTTCACGGCAACATTTTGATG      |
| <i>pmp-3</i>  | F                 | GTTCCCGTGTTCACTCAT          |
|               | R                 | ACACCGTCGAGAAGCTGTAGA       |

Table S9: Correlation coefficients between experimental replicates and strains analyzed by whole transcriptome profiling.

[Click here to Download Table S9](#)
